# Supplementary material for: Removal of Cr(VI) from Wastewater Using Graphene Oxide Chitosan Microspheres Modified with α–FeO(OH)
Source: MDPI journal article supplement (doi:10.3390/ma15144909), 2022-07-14
Supplement: s1 [file s1]

Supplementary Materials

# Removal of Cr(VI) from Wastewater Using Graphene Oxide Chitosan Microspheres Modified with $\alpha$ -FeO(OH)

Yunquan Liu <sup>1,2,3</sup>, Huimei Shan <sup>1,2,3,\*</sup>, Chunya Zeng <sup>1,2,3</sup>, Hongbin Zhan <sup>4,\*</sup> and Yanyue Pang <sup>1,2,3</sup>

<sup>1</sup> Guangxi Key Laboratory of Environmental Pollution Control Theory and Technology, Guilin University of Technology, Guilin 541004, China; buddychampion@163.com (Y.L.); 15078381513@163.com (C.Z.); pangyanyue080512@163.com (Y.P.)

<sup>2</sup> Collaborative Innovation Center of Water Pollution Control and Water Security in Karst Area, Guilin University of Technology, Guilin 541004, China

<sup>3</sup> College of Environmental Science and Engineering, Guilin University of Technology, Guilin 541004, China

<sup>4</sup> Department of Geology and Geophysics, Texas A&M University, College Station, TX 77843, USA

\* Correspondence: shanhuimei@glut.edu.cn (H.S.); zhan@tamu.edu (H.Z.); Tel.: +1-(979)-862-7961 (H.Z.); Fax: +1-(979)-845-6162 (H.Z.)

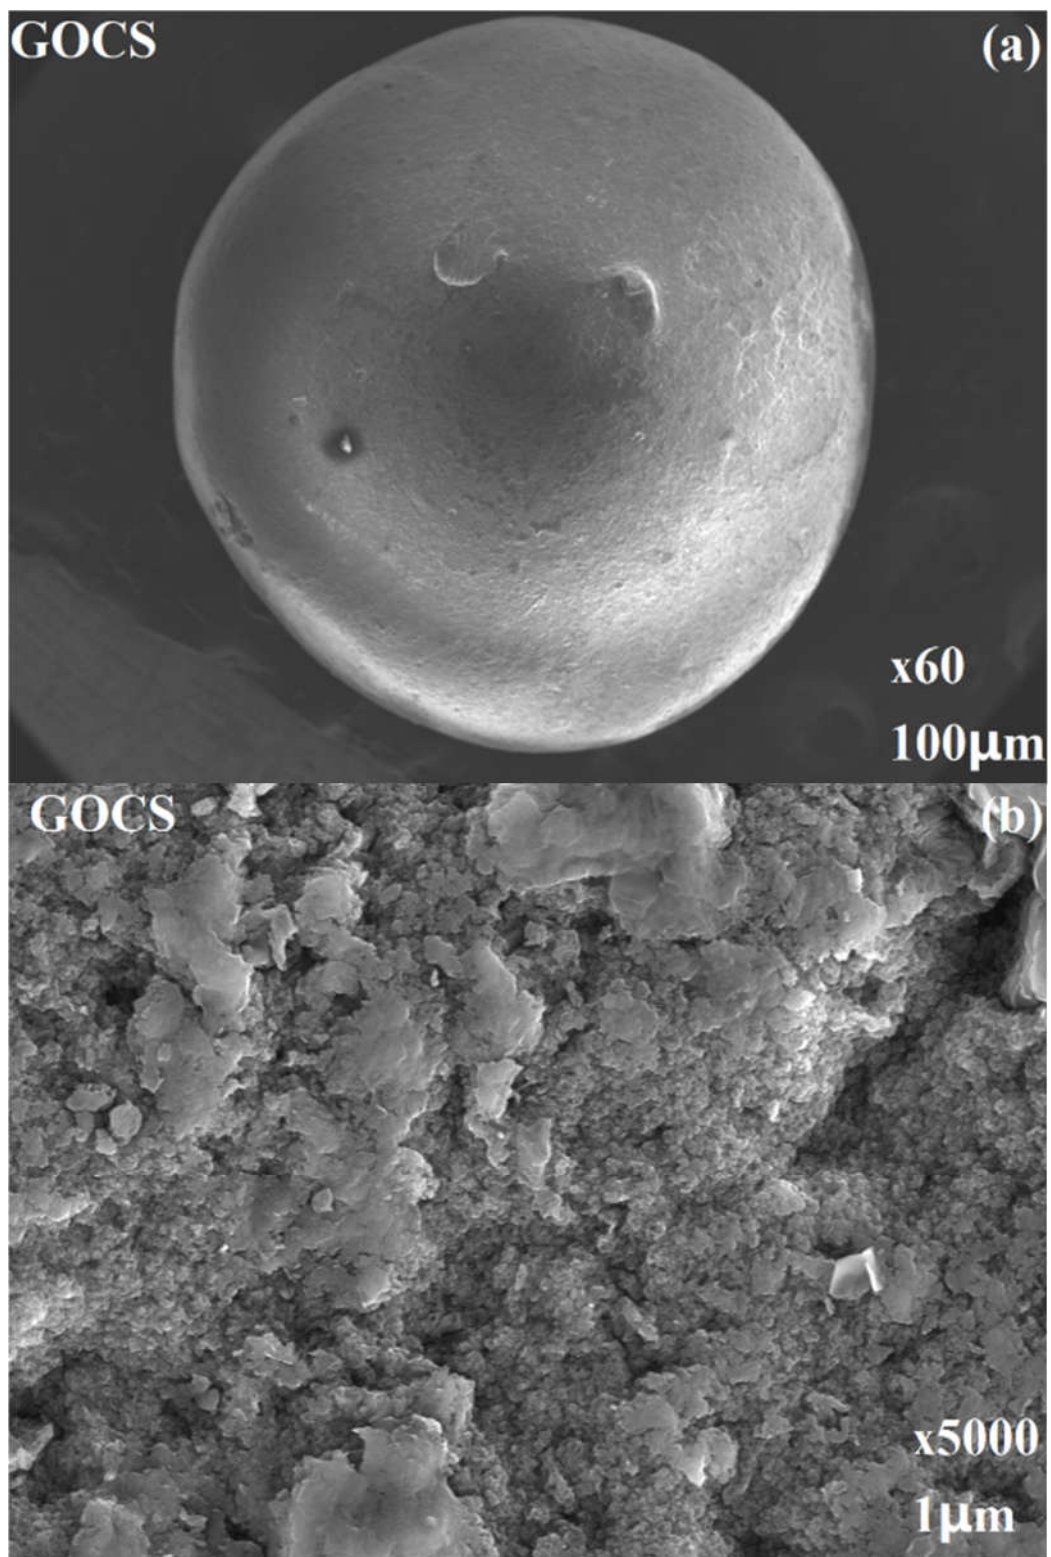

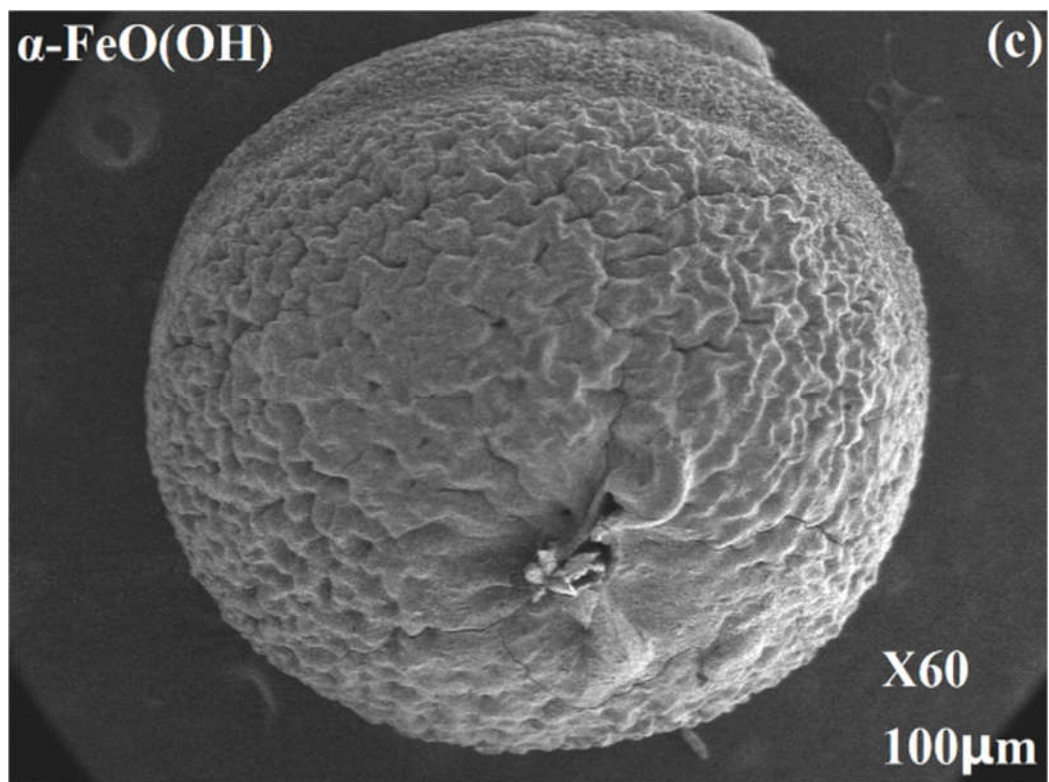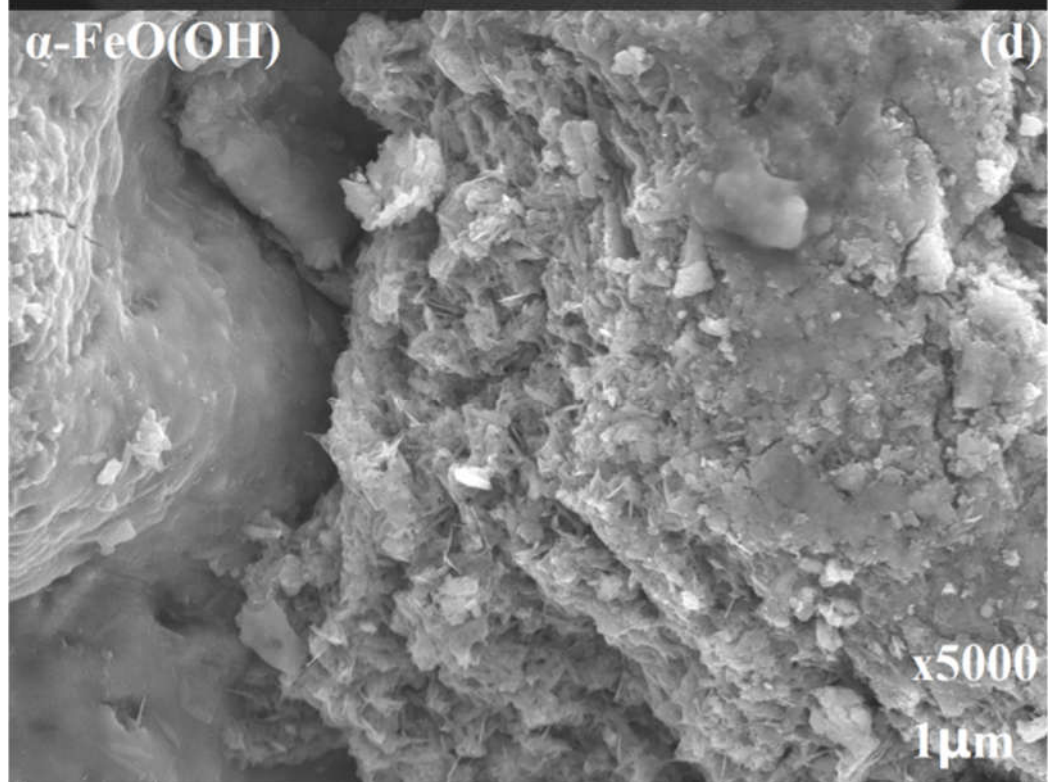

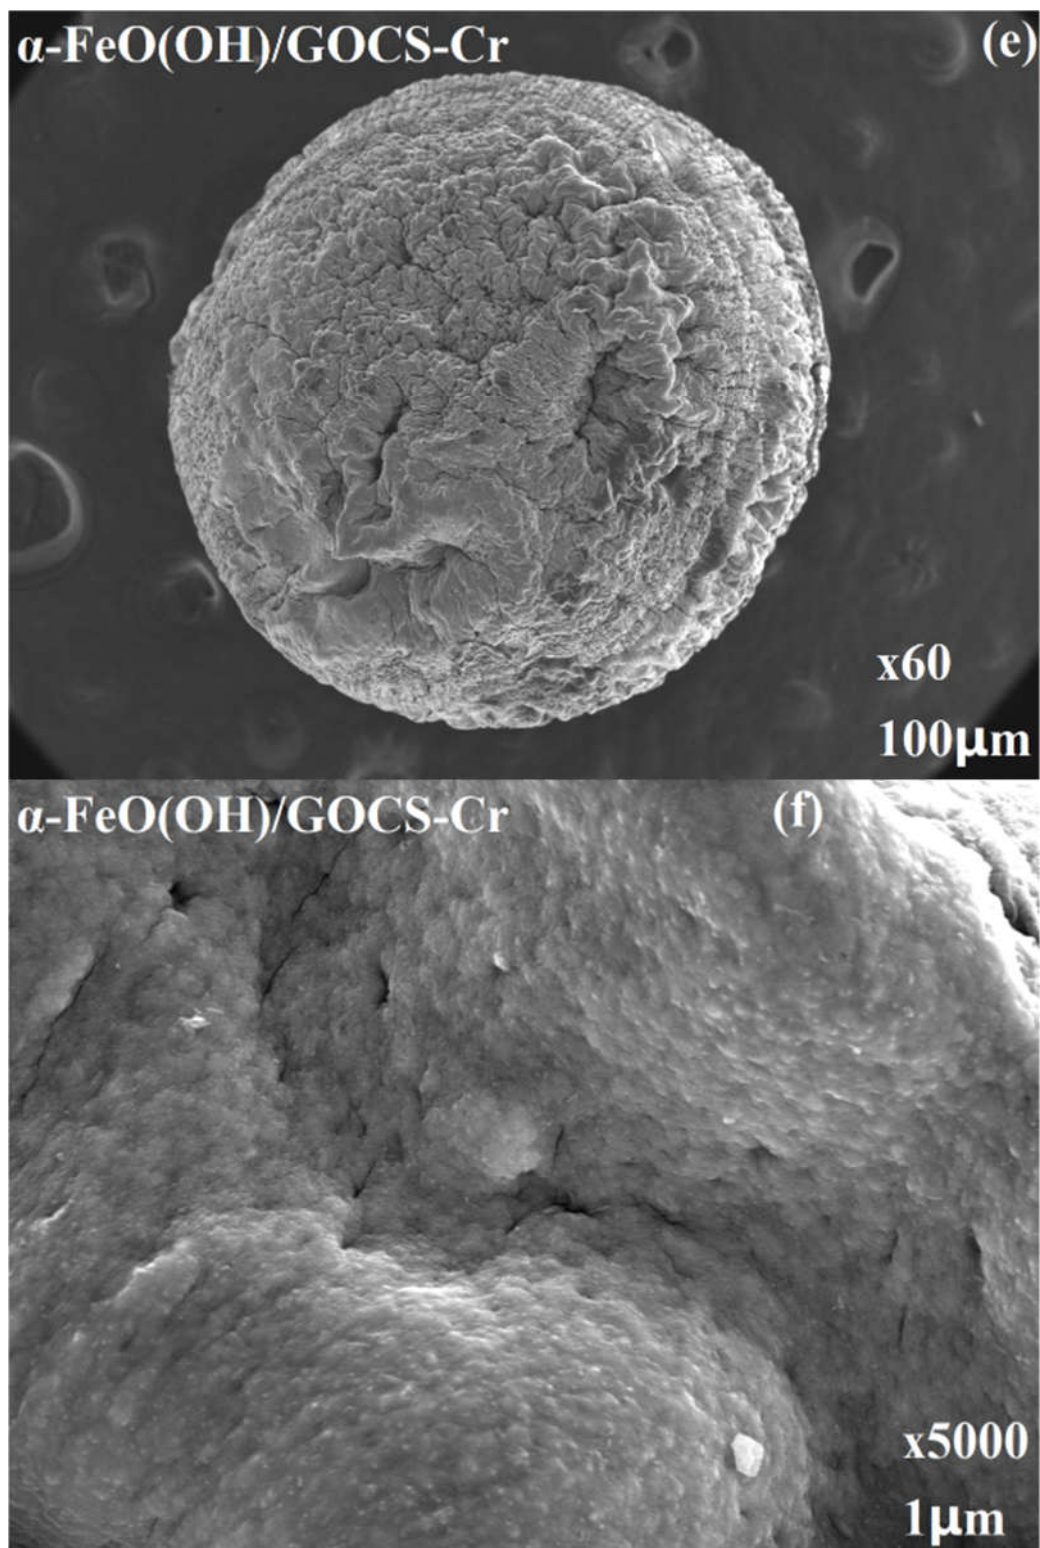

Figure S1. SEM images of GOCS(a,b),  $\alpha\text{-FeO(OH)/GOCS}$  before (c,d)/after (e,f) adsorption.

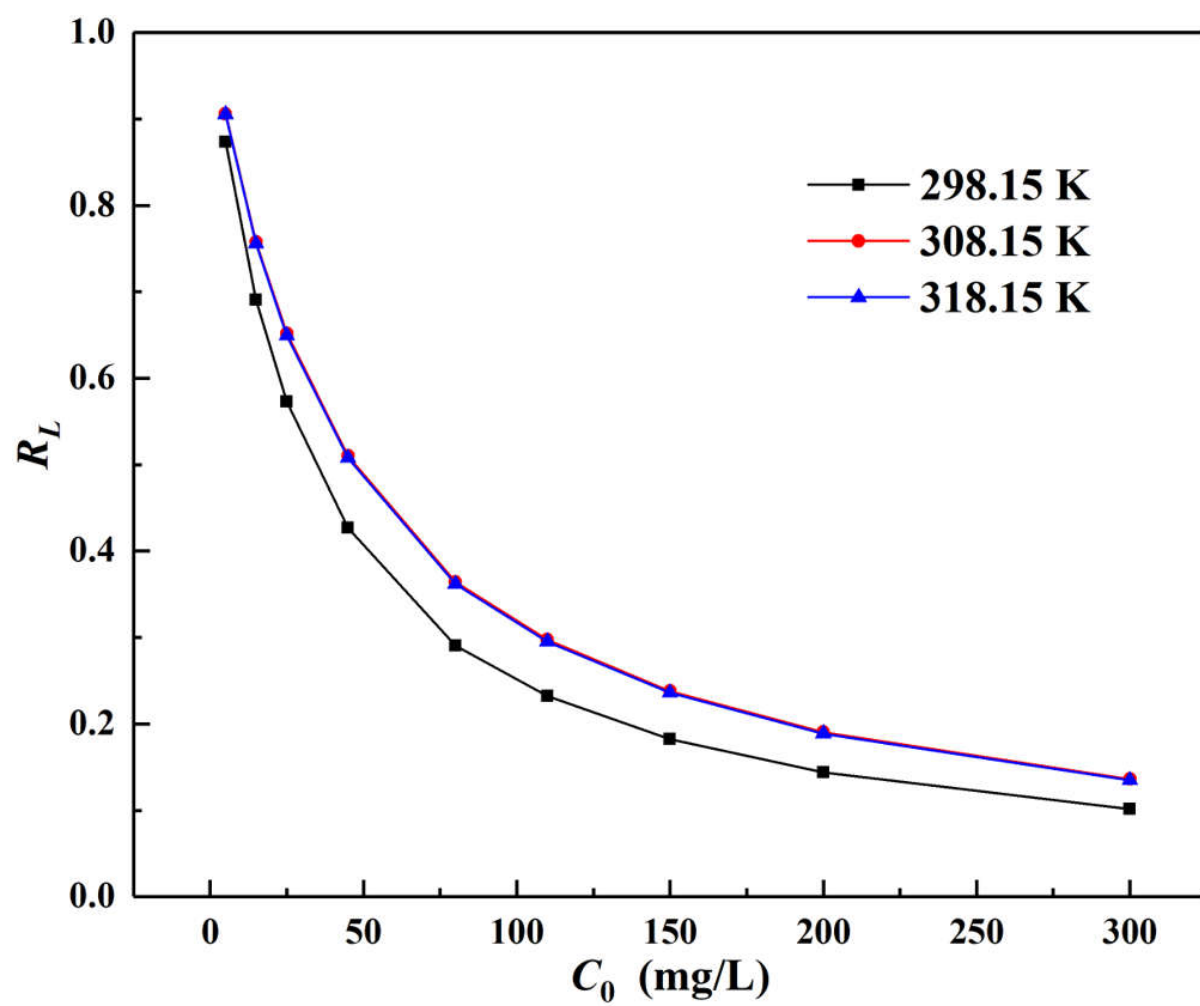

Figure S2.  $R_L$  of  $\alpha$ -FeO(OH)/GOCS adsorbs Cr(VI).



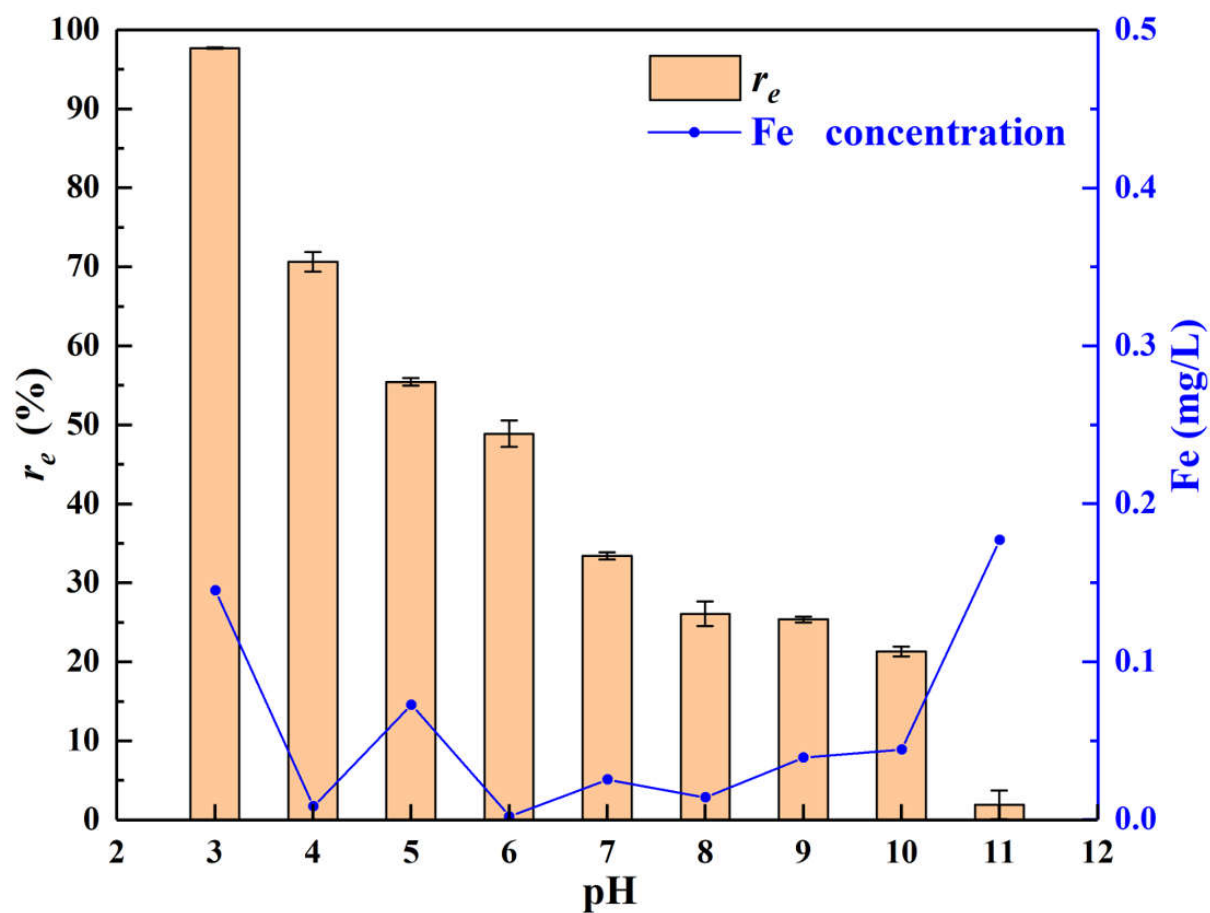

**Figure S3.** Cr(VI) removal rate and Fe concentration change with pH value. (The actual pH value of aqueous solution is 3.0, the initial concentration of Cr(VI) is 25 mg/L, and the reaction time is 3840 min. The adsorption is carried out at an oscillation rate of 170 rpm and a temperature of 298.15 K.).

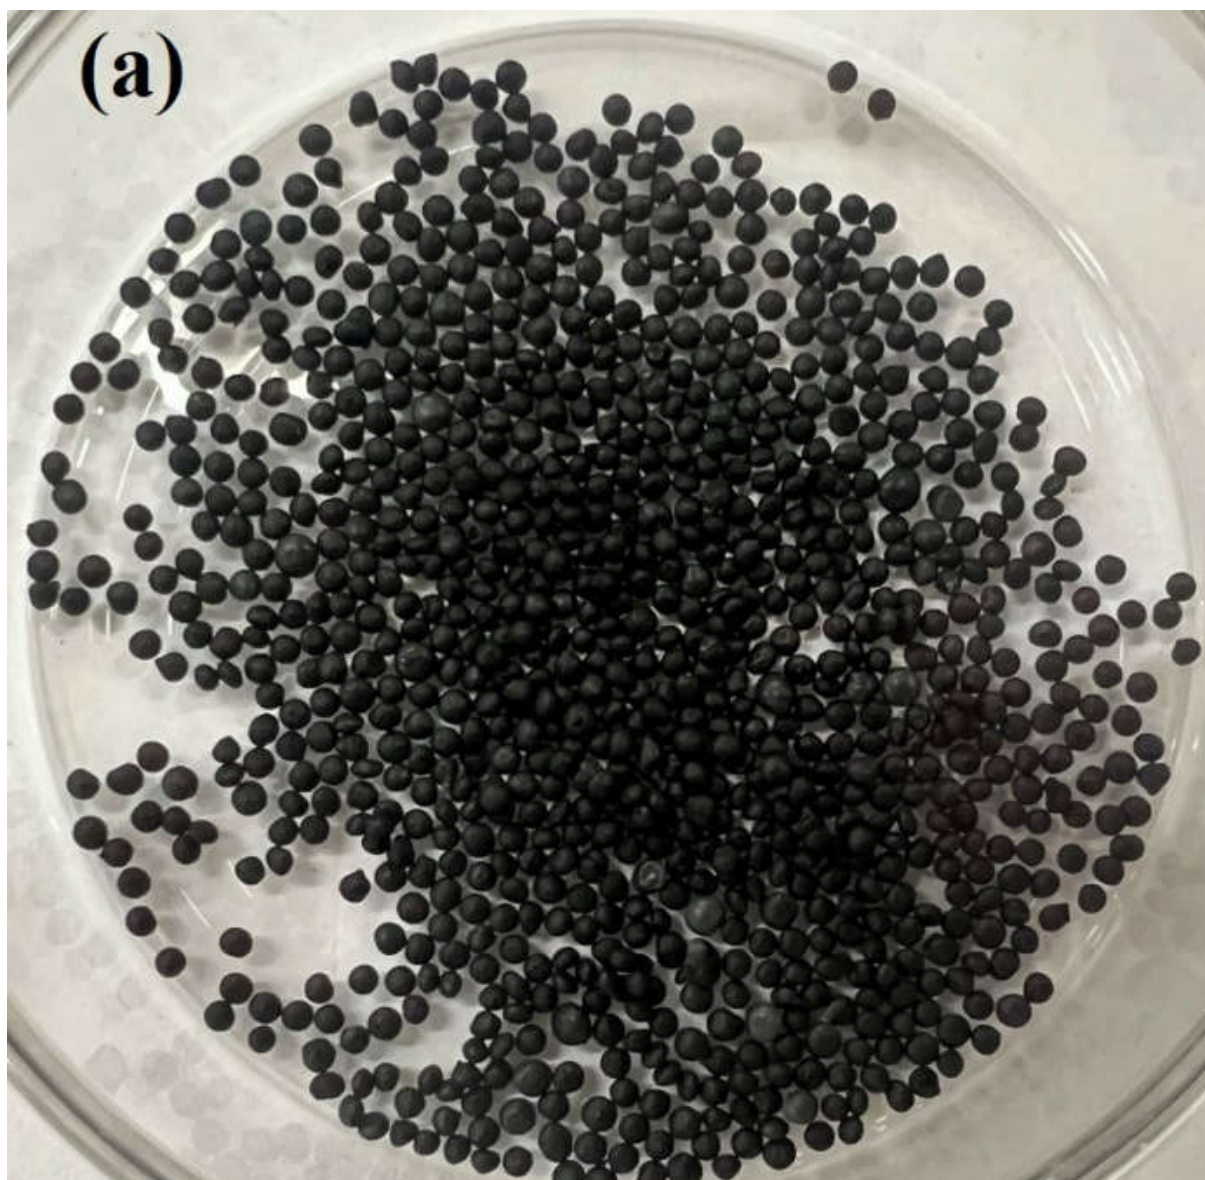

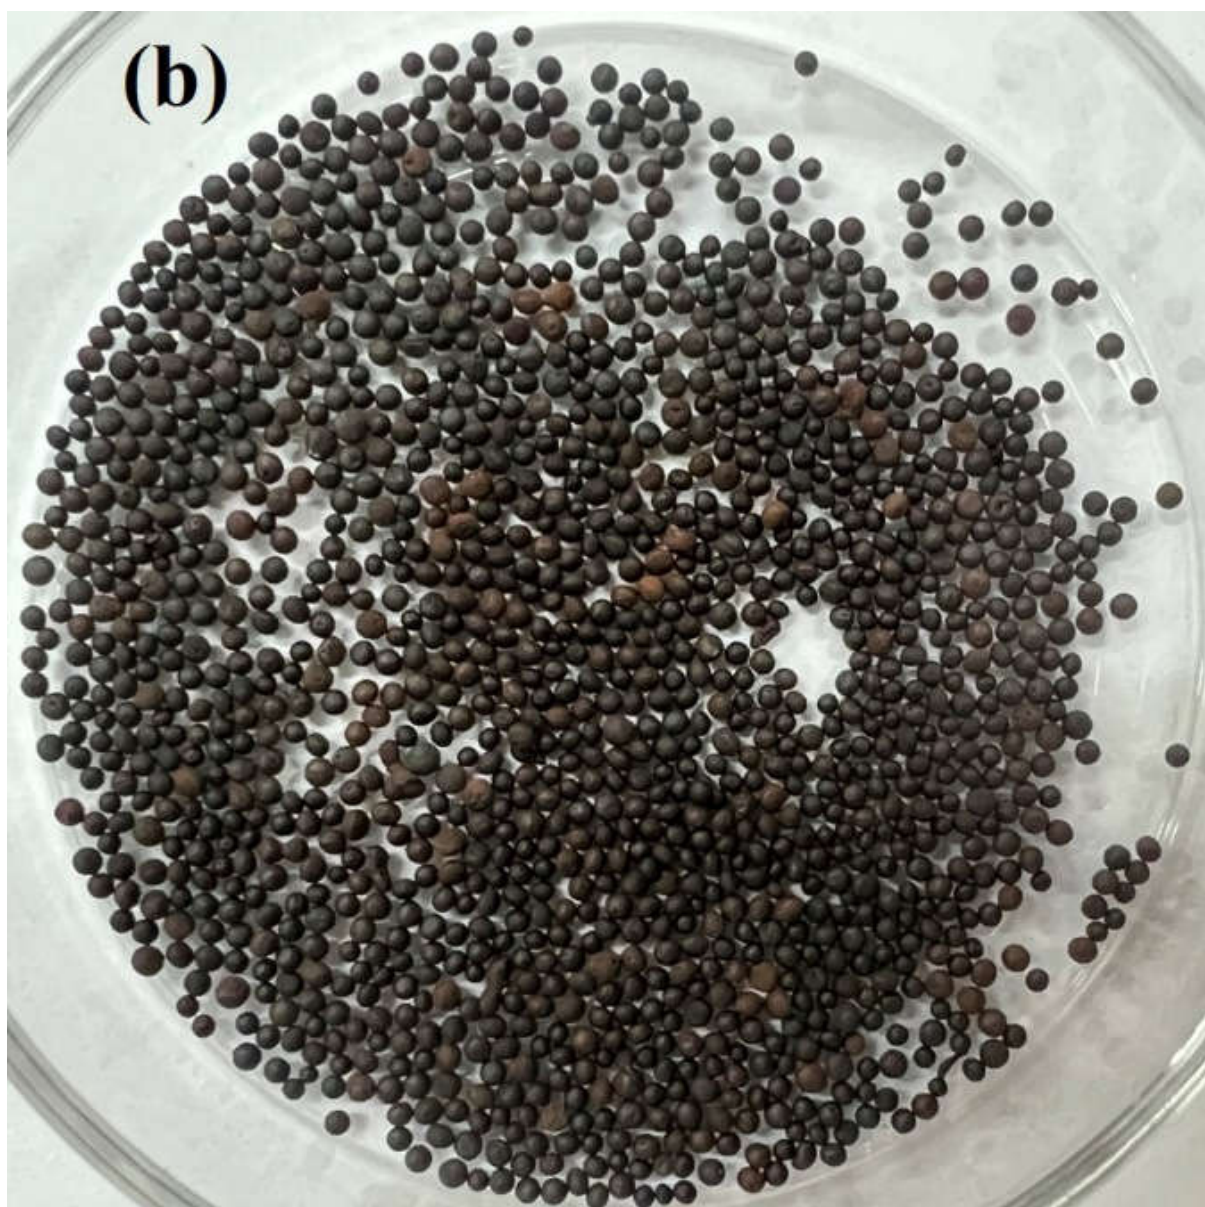

**Figure S4.** GOCS(a) and  $\alpha$ -FeO(OH)/GOCS(b) microspheres.
